# Supplementary material for: Socrates: A Novel N-Ethyl-N-nitrosourea-Induced Mouse Mutant with Audiogenic Epilepsy
Source: MDPI journal article supplement (doi:10.3390/ijms242317104), 2023-12-04
Supplement: s1 [file s1]

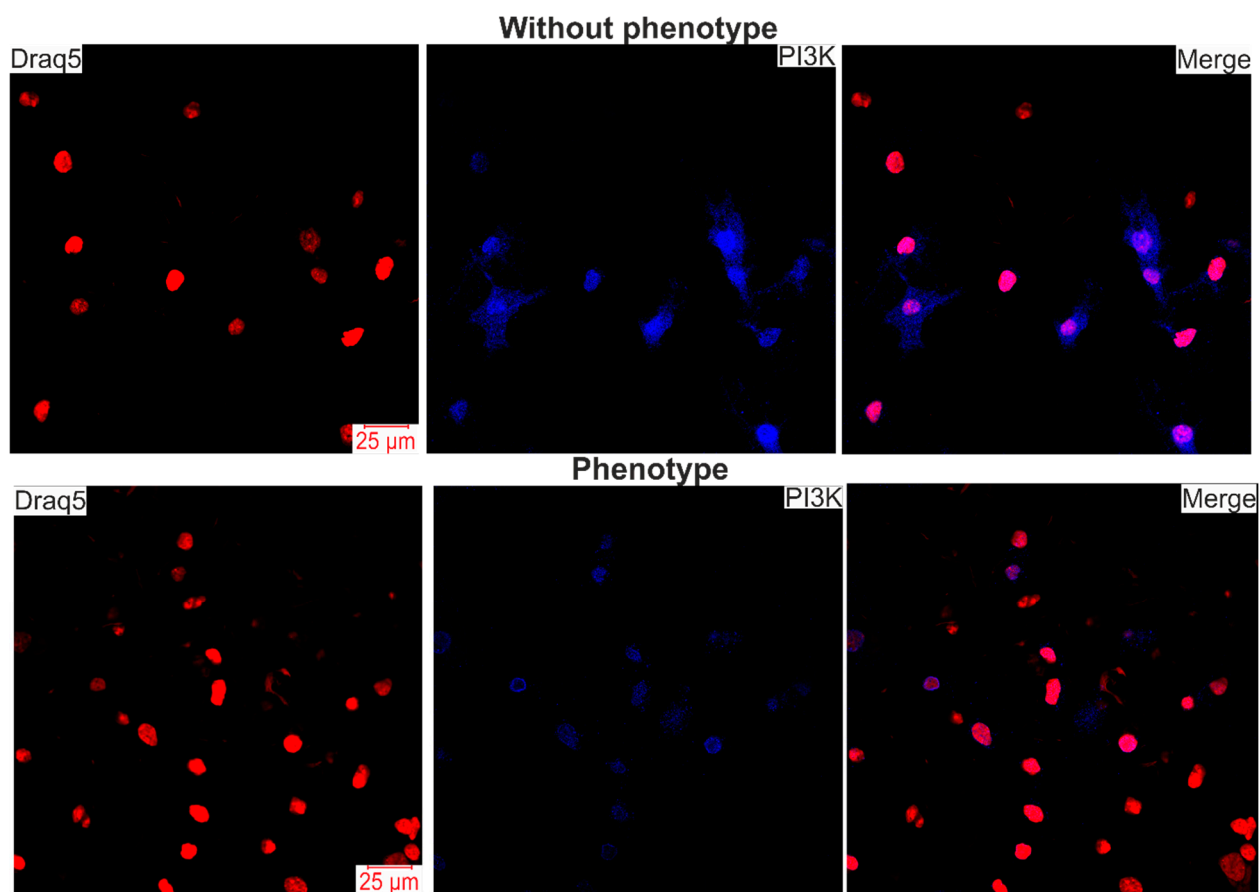

**Figure S1.** Immunocytochemical staining of cortical neurons derived from without phenotype and phenotype mice with antibodies against phosphoinositide 3-kinase (PI3K). Nuclei staining with Draq5.

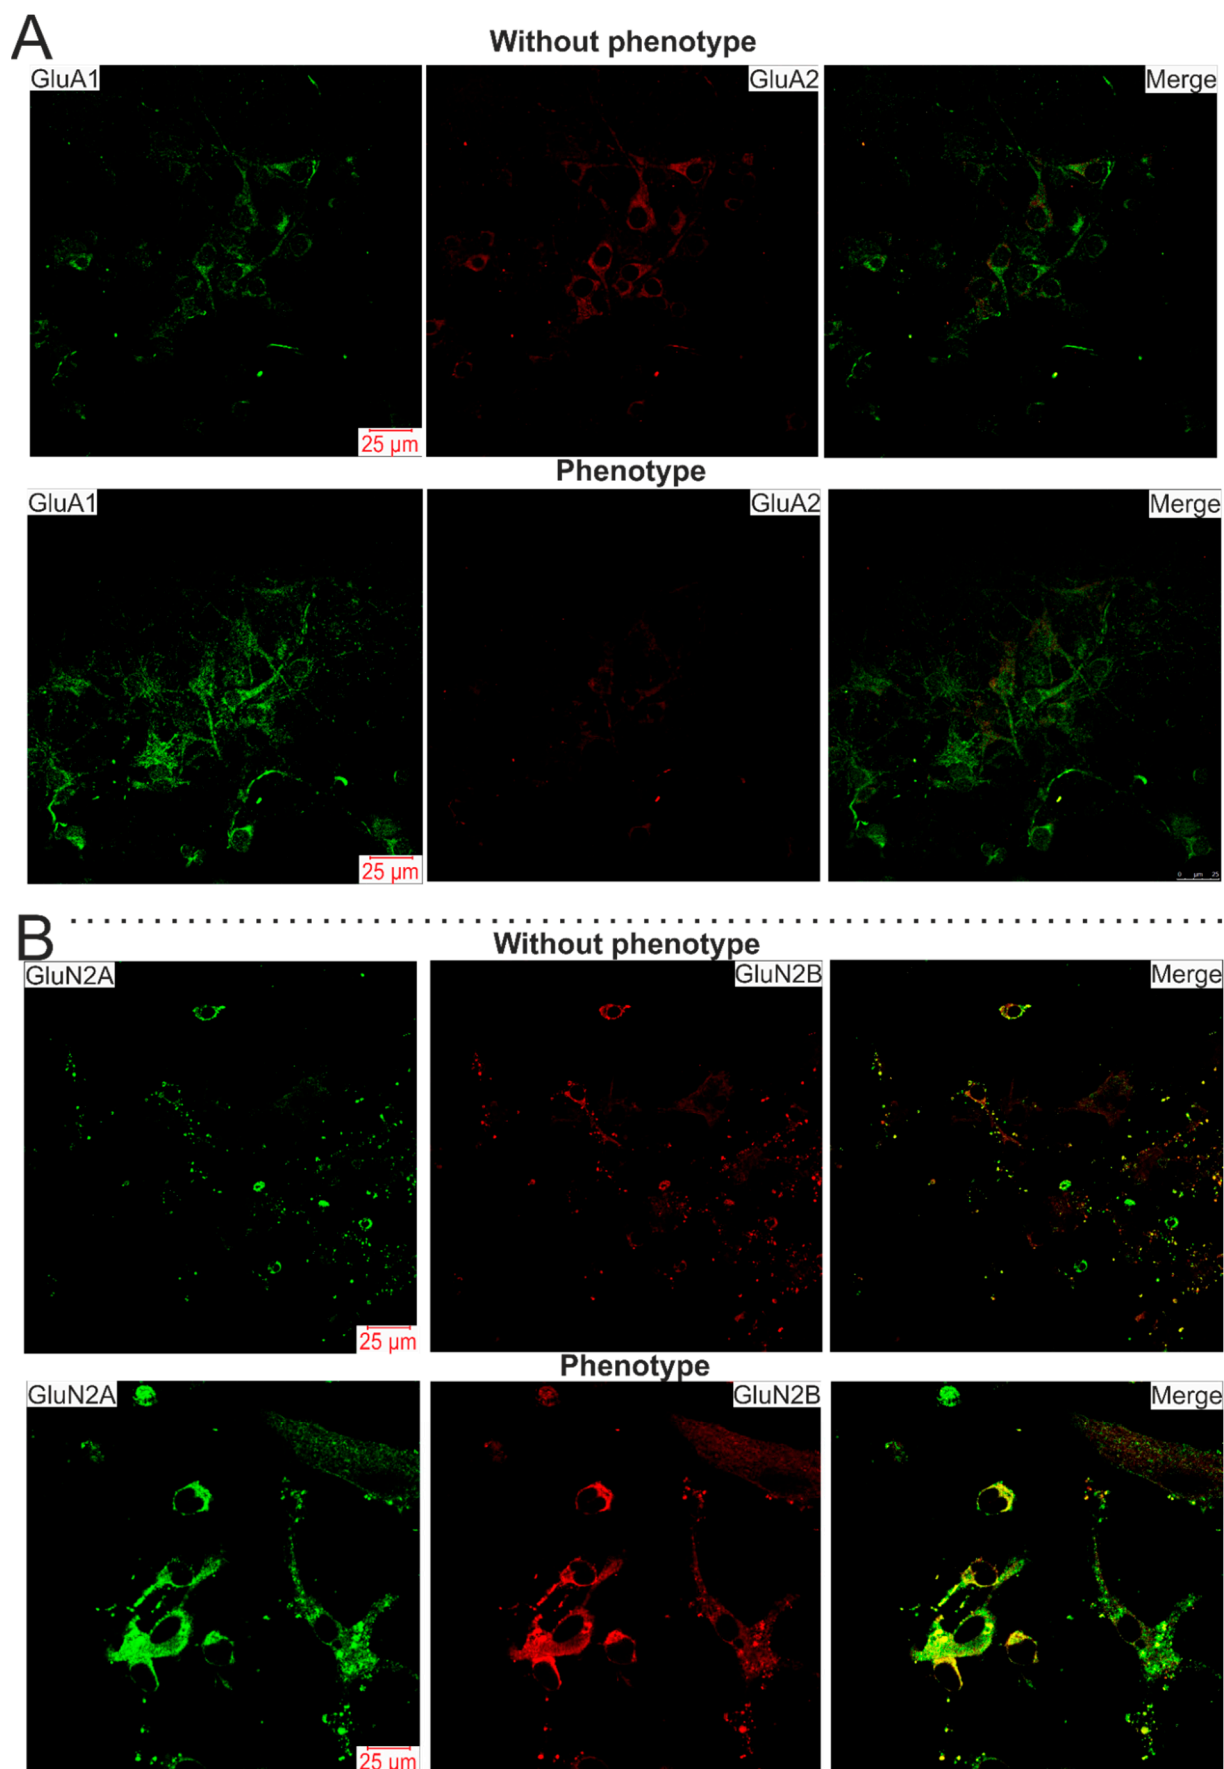

**Figure S2.** Immunocytochemical staining of cortical neurons derived from without phenotype and phenotype mice with antibodies against GluA1- and GluA2-subunits of AMPAR (A) and against GluN2A and GluN2B-subunits of NMDAR (B). Nuclei staining with Draq5.
